# Supplementary material for: The road from intermittently scanned continuous glucose monitoring to hybrid closed-loop systems. Part B: results from randomized controlled trials
Source: PubMed Central journal article supplement — Ther Adv Endocrinol Metab. 2019 Aug 30;10:2042018819871903. doi: 10.1177/2042018819871903 (PMC6719474; doi:10.1177/2042018819871903), 2019-08-30
Supplement: Supplementary_material_pdf.pdf [file Supplementary_material_pdf.pdf]

**Appendix 1:** PubMed and Cochrane Central Register of Controlled Trials search strategy

**We searched for RCTs published within the last five years**, using the following search string **in PubMed**: ("Diabetes Mellitus, Type 1"[Mesh] OR (diabetes mellitus type 1) OR (diabetes type 1) OR (type 1 diabetes)) AND ((sensor-augmented pump therapy) OR (sensor-augmented insulin pump) OR (sensor-augmented pump) OR (low-glucose suspend) OR (predictive low-glucose insulin suspension) OR (continuous glucose monitoring) OR (continuous glucose monitor) OR (continuous glucose monitoring system) OR (real-time continuous glucose monitoring) OR (flash glucose monitoring) OR (flash continuous glucose monitoring) OR (intermittently scanned continuous glucose monitoring) OR (intermittently viewed continuous glucose monitoring) OR (closed-loop insulin delivery) OR (hybrid closed-loop) OR (hybrid closed-loop insulin-delivery system) OR (artificial pancreas) OR (single-hormone artificial pancreas) OR (dual-hormone artificial pancreas)) AND Randomized Controlled Trial[ptyp] AND "last 5 years"[PDat]. **The same search terms were used for the search in the Cochrane Database.**

**Appendix 2: Scoring the methodological quality of RCTs**

| <b>Study</b>                    | <b>1</b> | <b>2</b> | <b>3</b> | <b>4</b> | <b>5</b> | <b>6</b> | <b>7</b> | <b>8</b> | <b>9</b> | <b>10</b> | <b>11</b> | <b>Total</b> | <b>%</b> |
|---------------------------------|----------|----------|----------|----------|----------|----------|----------|----------|----------|-----------|-----------|--------------|----------|
| <b>Burckhardt MA, 2018 (1)</b>  | +        | +        | -        | NR       | NR       | NR       | +        | +        | -        | +         | +         | 6/11         | 55       |
| <b>Tauschmann M, 2018 (2)</b>   | +        | +        | -        | NR       | +        | +        | +        | +        | +        | -         | +         | 8/11         | 73       |
| <b>Reddy M, 2018 (3)</b>        | +        | +        | -        | NR       | +        | +        | +        | +        | +        | +         | +         | 7/11         | 82       |
| <b>Ólafsdóttir AF, 2018 (4)</b> | +        | NR       | -        | NR       | +        | +        | +        | +        | +        | -         | NR        | 6/11         | 55       |
| <b>Heinemann L, 2018 (5)</b>    | +        | +        | -        | -        | +        | +        | +        | +        | NR       | -         | +         | 7/11         | 64       |
| <b>Oskarsson P, 2017 (6)</b>    | +        | +        | -        | NR       | +        | +        | +        | +        | +        | -         | NR        | 7/11         | 64       |
| <b>Reddy M, 2017 (7)</b>        | +        | +        | -        | NR       | +        | +        | +        | +        | +        | +         | +         | 9/11         | 82       |
| <b>Abraham MB, 2018 (8)</b>     | +        | +        | -        | NR       | +        | +        | +        | +        | +        | +         | +         | 9/11         | 82       |
| <b>Polonsky WH, 2017 (9)</b>    | +        | +        | -        | NR       | +        | +        | +        | +        | +        | -         | +         | 8/11         | 73       |
| <b>Barnard KD, 2017 (10)</b>    | +        | NR       | -        | NR       | NR       | +        | +        | +        | +        | +         | -         | 6/11         | 55       |
| <b>Lind M, 2017 (11)</b>        | +        | +        | -        | NR       | +        | +        | +        | +        | +        | -         | -         | 7/11         | 64       |
| <b>Beck RW, 2017 (12)</b>       | +        | +        | -        | NR       | +        | +        | +        | +        | +        | -         | +         | 8/11         | 73       |
| <b>van Beers CA, 2016 (13)</b>  | +        | +        | -        | NR       | NR       | +        | +        | +        | +        | -         | +         | 7/11         | 64       |

|                                 |   |   |   |    |    |   |   |   |   |   |   |      |           |
|---------------------------------|---|---|---|----|----|---|---|---|---|---|---|------|-----------|
| <b>Bolinder J, 2016 (14)</b>    | + | + | - | -  | -  | + | + | + | + | - | - | 6/11 | <b>55</b> |
| <b>Thabit H, 2015 (15)</b>      | + | + | - | -  | -  | + | + | + | + | - | + | 7/11 | <b>64</b> |
| <b>Hommel E, 2014 (16, 17)</b>  | + | + | - | NR | NR | + | + | + | - | - | + | 6/11 | <b>55</b> |
| <b>Little SA, 2014 (18, 19)</b> | + | + | - | NR | +  | + | + | + | + | + | + | 9/11 | <b>82</b> |
| <b>Little SA, 2018 (18, 19)</b> | + | + | - | NR | +  | + | + | + | + | + | + | 9/11 | <b>82</b> |
| <b>Tumminia A, 2015 (20)</b>    | + | + | - | -  | +  | - | + | + | + | + | - | 7/11 | <b>64</b> |

[1] Adequate randomization: Was the allocation of the intervention to patients randomised?

[2] Those who allocated the patients should be unaware of the randomization (sequence). Was that the case?

[3] Were patients and clinicians blinded to the treatment?

[4] Were the effect assessors (researchers) blinded to the treatment?

[5] Baseline similarity: Were the groups (treatment and control) at the beginning of the trial comparable? If not, is there a correction for it in the analysis?

[6] Withdrawals and drop outs: Is there a complete follow-up available of an adequate proportion of all included patients? If not, is selective loss to follow-up sufficiently excluded? (<20% for short term follow up and <30% for intermediate and long-term follow-up)

[7] Are all enrolled patients analysed in the groups to which they were randomised?

[8] Are the groups, apart from the intervention, treated equally? (Co-intervention: standardised or avoided)

[9] Is selective publication of results sufficiently excluded?

[10] Is inappropriate influence of sponsoring sufficiently excluded?

[11] Are the results analysed by the 'intention to treat' principle?

NR = not reported

**Appendix 3: Quality of evidence**

| <i>Outcome measures</i> | <i>Intervention</i>     | <i>Studies</i>            | <i>Population</i>     | <i>Level of evidence</i> | <i>Quality of evidence</i> |
|-------------------------|-------------------------|---------------------------|-----------------------|--------------------------|----------------------------|
| <b>HbA1c</b>            | <b>isCGM = SMBG</b>     | Oskarsson P, 2017 (6)     | Adults                | Moderate B               | Level 3                    |
|                         |                         | Bolinder J, 2016 (14)     | Adults                | Moderate B               |                            |
|                         | <b>RT-CGM = isCGM</b>   | Reddy M, 2018 (3)         | Adults                | High A2                  | Level 3                    |
|                         |                         | Reddy M, 2017 (7)         | Adults                | High A2                  |                            |
|                         | <b>RT-CGM &gt; SMBG</b> | Lind M, 2017 (+) (11)     | Adults                | Moderate B               | Level 2                    |
|                         |                         | Beck RW, 2017 (+) (12)    | Adults                | High A2                  |                            |
|                         |                         | Tumminia A, 2015 (+) (20) | Adults                | Moderate B               |                            |
|                         | <b>RT-CGM = SMBG</b>    | Burckhardt MA, 2018 (1)   | Children &<br>Parents | Moderate B               | Level 2                    |
|                         |                         | Heinemann L, 2018 (5)     | Adults                | Moderate B               |                            |
|                         |                         | Little SA, 2018 (+) (19)  | Adults                | High A2                  |                            |

|                       |                          |                             |                      |            |         |
|-----------------------|--------------------------|-----------------------------|----------------------|------------|---------|
|                       |                          | van Beers CA, 2016 (13)     | Adults               | Moderate B |         |
|                       |                          | Little SA, 2014 (18)        | Adults               | High A2    |         |
|                       | <b>HCL/PLGS = SAP</b>    | Abraham MB, 2018 (8)        | Children             | High A2    | Level 3 |
|                       | <b>HCL/PLGS &gt; SAP</b> | Tauschmann M, 2018 (+) (2)  | Adults &<br>Children | High A2    | Level 2 |
|                       |                          | Thabit H, 2015 (+) (15)     | Adults               | Moderate B |         |
| <b>Time in target</b> | <b>RT-CGM &gt; isCGM</b> | Reddy M, 2018 (-) (3)       | Adults               | High A2    | Level 3 |
|                       |                          | Reddy M, 2017 (-) (7)       | Adults               | High A2    |         |
| <b>Time in range</b>  | <b>isCGM &gt; SMBG</b>   | Oskarsson P, 2017 (+) (6)   | Adults               | Moderate B | Level 3 |
|                       |                          | Bolinder J, 2016 (+) (14)   | Adults               | Moderate B |         |
|                       | <b>RT-CGM &gt; isCGM</b> | Reddy M, 2018 (+) (3)       | Adults               | High A2    | Level 3 |
|                       |                          | Reddy M, 2017 (±) (7)       | Adults               | High A2    |         |
|                       | <b>RT-CGM &gt; SMBG</b>  | Heinemann L, 2018 (±) (5)   | Adults               | Moderate B | Level 2 |
|                       |                          | Beck RW, 2017 (+) (12)      | Adults               | High A2    |         |
|                       |                          | van Beers CA, 2016 (+) (13) | Adults               | Moderate B |         |

|                                  |                          |                              |                      |            |         |
|----------------------------------|--------------------------|------------------------------|----------------------|------------|---------|
|                                  | <b>HCL/PLGS &gt; SAP</b> | Tauschmann M, 2018 (+) (2)   | Adults &<br>Children | High A2    | Level 2 |
|                                  |                          | Thabit H, 2015 (+) (15)      | Adults               | Moderate B |         |
| <b>Time in<br/>hypoglycaemia</b> | <b>isCGM &gt; SMBG</b>   | Oskarsson P, 2017 (+) (6)    | Adults               | Moderate B | Level 3 |
|                                  |                          | Bolinder J, 2016 (+) (14)    | Adults               | Moderate B |         |
|                                  | <b>RT-CGM &gt; isCGM</b> | Reddy M, 2018 (+) (3)        | Adults               | High A2    | Level 3 |
|                                  |                          | Reddy M, 2017 (+) (7)        | Adults               | High A2    |         |
|                                  | <b>RT-CGM &gt; SMBG</b>  | Ólafsdóttir AF, 2018 (+) (4) | Adults               | Moderate B | Level 2 |
|                                  |                          | Heinemann L, 2018 (+) (5)    | Adults               | Moderate B |         |
|                                  |                          | Lind M, 2017 (-) (11)        | Adults               | Moderate B |         |
|                                  |                          | Beck RW, 2017 (+) (12)       | Adults               | High A2    |         |
|                                  |                          | van Beers CA, 2016 (+) (13)  | Adults               | Moderate B |         |
|                                  | <b>RT-CGM = SMBG</b>     | Little SA, 2018 (+) (18)     | Adults               | High A2    | Level 3 |
|                                  |                          | Little SA, 2014 (+) (19)     | Adults               | High A2    |         |

|                        |                          |                              |                       |            |         |
|------------------------|--------------------------|------------------------------|-----------------------|------------|---------|
|                        | <b>HCL/PLGS &gt; SAP</b> | Abraham MB, 2018 (+) (8)     | Children              | High A2    | Level 1 |
|                        |                          | Tauschmann M, 2018 (±) (2)   | Adults &<br>Children  | High A2    |         |
|                        |                          | Thabit H, 2015 (±) (15)      | Adults                | Moderate B |         |
| <b>Quality of life</b> | <b>isCGM &gt; SMBG</b>   | Oskarsson P, 2017 (+) (6)    | Adults                | Moderate B | Level 3 |
|                        |                          | Bolinder J, 2016 (+) (14)    | Adults                | Moderate B |         |
|                        | <b>RT-CGM &gt; isCGM</b> | Reddy M, 2018 (+) (7)        | Adults                | High A2    | Level 3 |
|                        |                          | Reddy M, 2017 (+) (7)        | Adults                | High A2    |         |
|                        | <b>RT-CGM &gt; SMBG</b>  | Burckhardt MA, 2018 (+) (1)  | Children &<br>Parents | Moderate B | Level 1 |
|                        |                          | Ólafsdóttir AF, 2018 (+) (4) | Adults                | Moderate B |         |
|                        |                          | Heinemann L, 2018 (-) (5)    | Adults                | Moderate B |         |
|                        |                          | Polonsky WH, 2017 (+) (9)    | Adults                | High A2    |         |
|                        |                          | Lind M, 2017 (+) (11)        | Adults                | Moderate B |         |
|                        |                          |                              |                       |            |         |

|  |                       |                          |                      |            |         |
|--|-----------------------|--------------------------|----------------------|------------|---------|
|  | <b>RT-CGM ≥ SMBG</b>  | Hommel E, 2014 (+) (17)  | Adults &<br>Children | Moderate B | Level 3 |
|  | <b>RT-CGM = SMBG</b>  | Little SA, 2018 (+) (19) | Adults               | High A2    | Level 2 |
|  |                       | van Beers CA, 2016 (13)  | Adults               | Moderate B |         |
|  |                       | Little SA, 2014 (+) (19) | Adults               | High A2    |         |
|  | <b>HCL/PLGS = SAP</b> | Abraham MB, 2018 (8)     | Children             | High A2    | Level 1 |
|  |                       | Tauschmann M, 2018 (2)   | Adults &<br>Children | High A2    |         |
|  |                       | Barnard KD, 2017 (10)    | Adults &<br>Children | Moderate B |         |

'(+)': Significant evidence  $p < 0,05$

'(-)': Non-significant evidence  $p \geq 0,05$

One intervention > other intervention: this means that the first intervention shows better results than the second

One intervention = other intervention: this means that the first intervention shows the same results as the second

One intervention < other intervention: this means that the first intervention shows worse results than the second



1. Burckhardt MA, Roberts A, Smith GJ, Abraham MB, Davis EA, Jones TW. The Use of Continuous Glucose Monitoring With Remote Monitoring Improves Psychosocial Measures in Parents of Children With Type 1 Diabetes: A Randomized Crossover Trial. *Diabetes care*. 2018;41(12):2641-3.
2. Tauschmann M, Thabit H, Bally L, Allen JM, Hartnell S, Wilinska ME, et al. Closed-loop insulin delivery in suboptimally controlled type 1 diabetes: a multicentre, 12-week randomised trial. *Lancet (London, England)*. 2018;392(10155):1321-9.
3. Reddy M, Jugnee N, Anantharaja S, Oliver N. Switching from Flash Glucose Monitoring to Continuous Glucose Monitoring on Hypoglycemia in Adults with Type 1 Diabetes at High Hypoglycemia Risk: The Extension Phase of the I HART CGM Study. *Diabetes technology & therapeutics*. 2018;20(11):751-7.
4. Olafsdottir AF, Polonsky W, Bolinder J, Hirsch IB, Dahlqvist S, Wedel H, et al. A Randomized Clinical Trial of the Effect of Continuous Glucose Monitoring on Nocturnal Hypoglycemia, Daytime Hypoglycemia, Glycemic Variability, and Hypoglycemia Confidence in Persons with Type 1 Diabetes Treated with Multiple Daily Insulin Injections (GOLD-3). *Diabetes technology & therapeutics*. 2018;20(4):274-84.
5. Heinemann L, Freckmann G, Ehrmann D, Faber-Heinemann G, Guerra S, Waldenmaier D, et al. Real-time continuous glucose monitoring in adults with type 1 diabetes and impaired hypoglycaemia awareness or severe hypoglycaemia treated with multiple daily insulin injections (HypoDE): a multicentre, randomised controlled trial. *Lancet (London, England)*. 2018;391(10128):1367-77.
6. Oskarsson P, Antuna R, Geelhoed-Duijvestijn P, Krger J, Weitgasser R, Bolinder J. Impact of flash glucose monitoring on hypoglycaemia in adults with type 1 diabetes managed with multiple daily injection therapy: a pre-specified subgroup analysis of the IMPACT randomised controlled trial. *Diabetologia*. 2018;61(3):539-50.
7. Reddy M, Jugnee N, El Laboudi A, Spanudakis E, Anantharaja S, Oliver N. A randomized controlled pilot study of continuous glucose monitoring and flash glucose monitoring in people with Type 1 diabetes and impaired awareness of hypoglycaemia. *Diabetic medicine : a journal of the British Diabetic Association*. 2018;35(4):483-90.
8. Abraham MB, Nicholas JA, Smith GJ, Fairchild JM, King BR, Ambler GR, et al. Reduction in Hypoglycemia With the Predictive Low-Glucose Management System: A Long-term Randomized Controlled Trial in Adolescents With Type 1 Diabetes. *Diabetes care*. 2018;41(2):303-10.
9. Polonsky WH, Hessler D, Ruedy KJ, Beck RW. The Impact of Continuous Glucose Monitoring on Markers of Quality of Life in Adults With Type 1 Diabetes: Further Findings From the DIAMOND Randomized Clinical Trial. *Diabetes care*. 2017;40(6):736-41.
10. Barnard KD, Wysocki T, Ullly V, Mader JK, Pieber TR, Thabit H, et al. Closing the Loop in Adults, Children and Adolescents With Suboptimally Controlled Type 1 Diabetes Under Free Living Conditions: A Psychosocial Substudy. *Journal of diabetes science and technology*. 2017;11(6):1080-8.
11. Lind M, Polonsky W, Hirsch IB, Heise T, Bolinder J, Dahlqvist S, et al. Continuous Glucose Monitoring vs Conventional Therapy for Glycemic Control in Adults With Type 1 Diabetes Treated With Multiple Daily Insulin Injections: The GOLD Randomized Clinical Trial. *Jama*. 2017;317(4):379-87.
12. Beck RW, Riddlesworth T, Ruedy K, Ahmann A, Bergenstal R, Haller S, et al. Effect of Continuous Glucose Monitoring on Glycemic Control in Adults With Type 1 Diabetes Using Insulin Injections: The DIAMOND Randomized Clinical Trial. *Jama*. 2017;317(4):371-8.
13. van Beers CA, DeVries JH, Kleijer SJ, Smits MM, Geelhoed-Duijvestijn PH, Kramer MH, et al. Continuous glucose monitoring for patients with type 1 diabetes and impaired awareness of hypoglycaemia (IN CONTROL): a randomised, open-label, crossover trial. *The lancet Diabetes & endocrinology*. 2016.
14. Bolinder J, Antuna R, Geelhoed-Duijvestijn P, Kroger J, Weitgasser R. Novel glucose-sensing technology and hypoglycaemia in type 1 diabetes: a multicentre, non-masked, randomised controlled trial. *Lancet (London, England)*. 2016;388(10057):2254-63.

15. Thabit H, Tauschmann M, Allen JM, Leelarathna L, Hartnell S, Wilinska ME, et al. Home Use of an Artificial Beta Cell in Type 1 Diabetes. *The New England journal of medicine*. 2015;373(22):2129-40.
16. Conget I, Battelino T, Gimenez M, Gough H, Castaneda J, Bolinder J. The SWITCH Study (Sensing With Insulin pump Therapy to Control HbA(1c)): Design and Methods of a Randomized Controlled Crossover Trial on Sensor-Augmented Insulin Pump Efficacy in Type 1 Diabetes Suboptimally Controlled with Pump Therapy. *Diabetes technology & therapeutics*. 2011;13(1):49-54.
17. Hommel E, Olsen B, Battelino T, Conget I, Schutz-Fuhrmann I, Hoogma R, et al. Impact of continuous glucose monitoring on quality of life, treatment satisfaction, and use of medical care resources: analyses from the SWITCH study. *Acta diabetologica*. 2014;51(5):845-51.
18. Little SA, Speight J, Leelarathna L, Walkinshaw E, Tan HK, Bowes A, et al. Sustained Reduction in Severe Hypoglycemia in Adults With Type 1 Diabetes Complicated by Impaired Awareness of Hypoglycemia: Two-Year Follow-up in the HypoCOMPASS Randomized Clinical Trial. *Diabetes care*. 2018;41(8):1600-7.
19. Little SA, Leelarathna L, Walkinshaw E, Tan HK, Chapple O, Lubina-Solomon A, et al. Recovery of Hypoglycemia Awareness in Long-standing Type 1 Diabetes: A Multicenter 2 x 2 Factorial Randomized Controlled Trial Comparing Insulin Pump With Multiple Daily Injections and Continuous With Conventional Glucose Self-monitoring (HypoCOMPASS). *Diabetes Care* 2014;37:2114-2122. *Diabetes care*. 2014;37(12):E272-E3.
20. Tumminia A, Crimi S, Sciacca L, Buscema M, Frittitta L, Squatrito S, et al. Efficacy of real-time continuous glucose monitoring on glycaemic control and glucose variability in type 1 diabetic patients treated with either insulin pumps or multiple insulin injection therapy: a randomized controlled crossover trial. *Diabetes/metabolism research and reviews*. 2015;31(1):61-8.
